# Supplementary material for: Examining pre-service science teachers’ development and utilization of written and oral argument and representation resources in an argument-based inquiry environment
Source: Royal Society of Chemistry journal article supplement (doi:10.1039/d2rp00152g), 2022-01-01
Supplement: d2rp00152g2.pdf [file d2rp00152g2.pdf]

Appendix B. Analytic and Holistic Frameworks

| Quality of argument                      | Criteria                                           | Scoring matrix                                                                                                                                                                                   |                                                                                                 |                                                                                             |                                                                                                                                                                           |                                                                                                                                                                                                                                                     |
|------------------------------------------|----------------------------------------------------|--------------------------------------------------------------------------------------------------------------------------------------------------------------------------------------------------|-------------------------------------------------------------------------------------------------|---------------------------------------------------------------------------------------------|---------------------------------------------------------------------------------------------------------------------------------------------------------------------------|-----------------------------------------------------------------------------------------------------------------------------------------------------------------------------------------------------------------------------------------------------|
|                                          |                                                    | 0                                                                                                                                                                                                | 5                                                                                               | 10                                                                                          | 15                                                                                                                                                                        |                                                                                                                                                                                                                                                     |
| Analytic of Argument (element component) | <b>Question</b>                                    | Can the question be answerable after carrying out the lab experiment?                                                                                                                            | *One question<br>*Not testable<br>*Inappropriate                                                | *One question<br>*Testable                                                                  | *Two or more questions<br>*testable and meaningful<br>*Show an understanding of what lab could result in                                                                  | *Two or more questions<br>*Testable and meaningful<br>*Demonstrate understanding of dependent and independent variable or appropriate application                                                                                                   |
|                                          | <b>Claim</b>                                       | *Are the claims a direct result of the data and observation?<br>*Are the claims adequate and accurate?                                                                                           | *One claim<br>*Not based on any data/observation<br>*Invalid and inaccurate                     | *One claim<br>*Based on only a portion of data/observation<br>*May not be valid or accurate | *Two or more claims<br>*Based on all data but does not grasp big picture<br>*May be valid and sound                                                                       | *Two or more claims<br>*Based on all data and graphs big picture<br>*Valid, sound, accurate                                                                                                                                                         |
|                                          | <b>Evidence</b>                                    | How well are the data and observation used in the evidence?<br>*Is evidence valid, accurate, and strong?                                                                                         | *Referred to some of the data<br>*Invalid, inaccurate, and unreliable                           | *Restate data/observation<br>*May not be accurate, valid, and reliable                      | *Interpret data/observation<br>*May be valid, accurate, and reliable                                                                                                      | *Explain and interpret data/observation<br>*Use proper Turkish with logical statements<br>*Accurate, valid, rich                                                                                                                                    |
|                                          | <b>Reflection</b>                                  | *How well are reading and reflection connected?<br>*Do students reflect how the evidence did or did not support the claim?                                                                       | *One source<br>*Linked poorly<br>*Very weak explanation for how ideas changed or did not change | *One source<br>*Linked well<br>*Weak explanation for how ideas changed or did not change    | *More than one source<br>*Linked well to evidence<br>*Explains most of the evidence and discuss initial questions<br>*Moderate understanding for how ideas changed or not | *More than one source<br>*Linked directly claims and evidence<br>*Writes using proper Turkish with logical statements, explains most of the evidence, and discuss initial questions<br>*Strong understanding for how ideas changed or didn't change |
|                                          | <b>Holistic Framework (relationship component)</b> | *How well are question, claim, evidence, reading, and reflection connected?<br>*Does SWH flow smoothly from one area to another area?<br>*How strong are the arguments developed by the student? | *Very weak connection<br>*Does not fit<br>*Do not flow smoothly<br>*Very weak argument          | *Weak connection<br>*Fits loosely<br>*May not flow smoothly<br>*Weak argument               | *Moderate connection<br>*Fits reasonably<br>*May flow smoothly<br>*Moderate argument                                                                                      | *Strong connection<br>*Fits strongly<br>*Flows smoothly<br>*Strong argument                                                                                                                                                                         |
